# Supplementary material for: Effective Design of Multifunctional Peptides by Combining Compatible Functions
Source: PubMed Central journal article supplement (PMC4838304; doi:10.1371/journal.pcbi.1004786), 2016-04-20

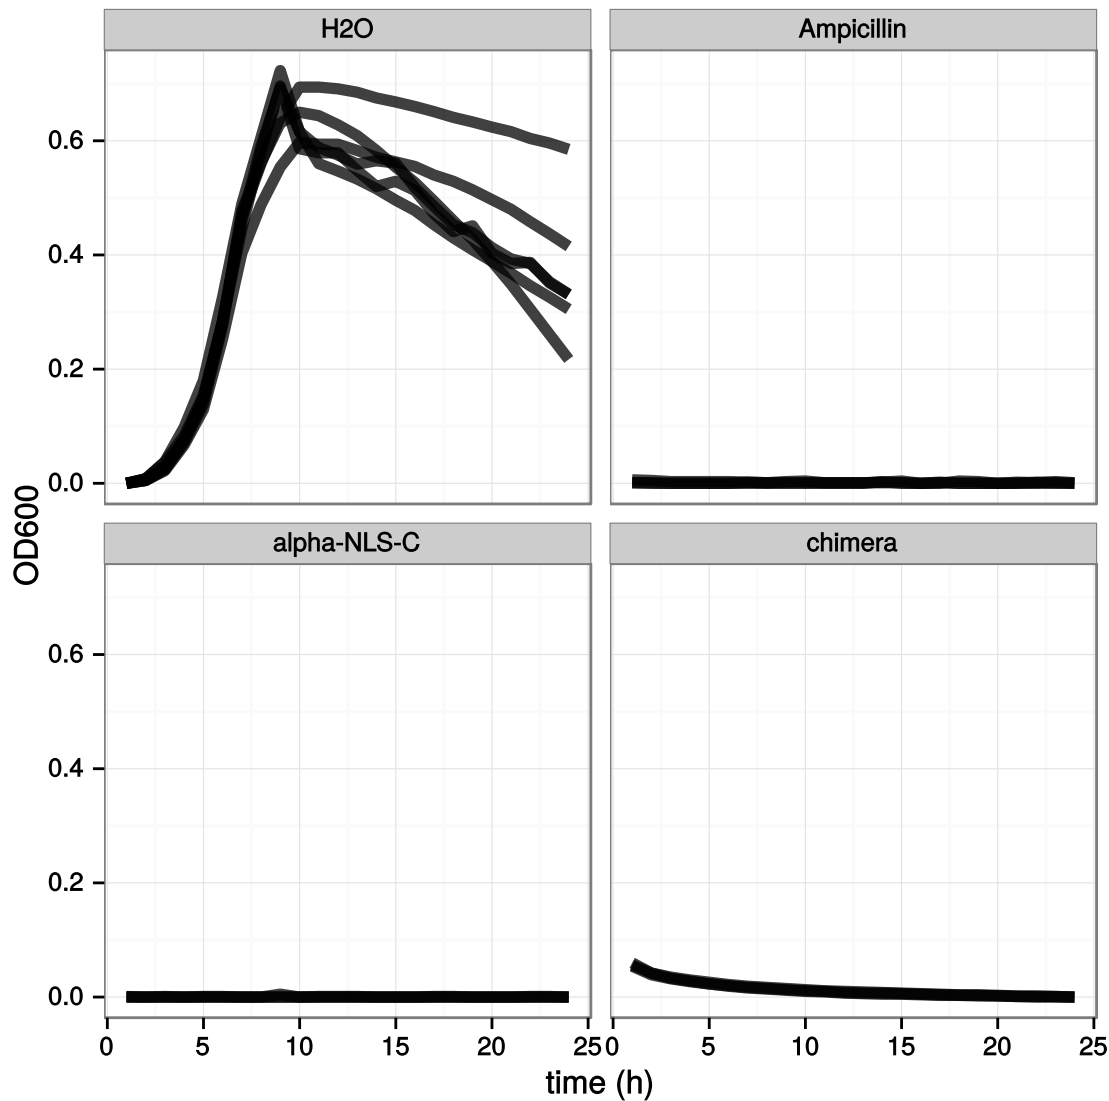

Supplement: pcbi.1004786.s004.pdf [file pcbi.1004786.s004.pdf]
